# Supplementary material for: Proteomic Detection of Non-Annotated Protein-Coding Genes in Pseudomonas fluorescens Pf0-1
Source: PubMed Central journal article supplement (PMC2794547; doi:10.1371/journal.pone.0008455), 2009-12-24
Supplement: pone.0008455.s001.pdf [file pone.0008455.s001.pdf]

**Figure S1.**

Alignment of genes annotated in *P. fluorescens* Pf0-1 opposite which are found "nov" genes. Alignments were produced in ClustalW2 (<http://www.ebi.ac.uk/Tools/clustalw2/index.html>). Where predicted orthologs existed in other *Pseudomonas* genomes, these were used for alignments. Regions shaded in grey for Pf0-1 lines indicate the portion of the protein specified by DNA which overlaps the nov gene.

**Colors in alignments:**

- RED = AVFPMILW (small+ hydrophobic (incl.aromatic -Y))
- BLUE = DE (Acidic)
- MAGENTA = RK (Basic)
- GREEN = STYHCNGQ (Hydroxyl + Amine + Basic - Q)

**Consensus symbols in the alignments:**

- \* = residues or nucleotides in that column are identical in all sequences in the alignment.
- : = conserved substitutions.
- . = semi-conserved substitutions.

Pf101\_ = Pf0-1  
 PA = *P. aeruginosa* PA01  
 PA14\_ = *P. aeruginosa* PA14  
 PFL = *P. fluorescens* Pf-5  
 PputW619\_ = *P. putida* W619  
 PSPPH\_ = *P. syringae* phaseolicola 1448A  
 PFLU = *P. fluorescens* SBW25  
 SELSPUOL\_ = *Selenomonas sputigena* ATCC 35185  
 BACCELL\_ = *Bacteroides cellulosilyticus* DSM 14838

**Pf101\_0636 (3' end is opposite 3' end of nov1)**

```

Pf101_0636 MS-RHSQCGGPARQRGAIGLMAALTGMALVFILVVVDSGRLYLERRHLQQIADVAALEA 59
PA4297 -----MNGWPARQRGAIGILAATLLLLALICLLLVVDTGRLYLEQRNLQRVADVAALES 54
PA14_55820 -----MNGWPARQRGAIGILAATLLLLALICLLLVVDTGRLYLEQRNLQRVADVAALES 54
PFL_0686 MSPLKRFYG-PARQRGAIGLMAAVTFGLALLLMLLVVDSGRLYMEQRKLQRVADNAALEA 59
PputW619_0838 MVPSS-----AARQRGAIGLMAVTTLALALLFMLVVVDSGRLYLEQRKLQRIADMAALEA 55
PSPPH_4415 MSPLDGYTAMPARQRGAIGMMAALTGLLALLCTLIVVDSGRLYLEKRSIQRVADIAALEA 60
          .*****:*. * : :*: * :*:*:*:*:*: * :*:** * :*:

```

```

Pf101_0636 ATRGGNCGA--GATANAYAQASVVRNPFPIPSAGRTLAVACGTLNLDASNLRVFAVNA-- 115
PA4297 ASQGALCGDQSSAQATSFAKASAMLNFGDADAAGSSLSAEVGGVLS-AGGLRSFIASASN 113
PA14_55820 ASQGALCGDQSSAQATSFAKASAMLNFGDADAAGSSLSAEVGGVLS-AGGLRSFIASASN 113
PFL_0686 VSRGGTCQA--GLTAAAYAGQNATRNNGFTVAT-GSSLSTSCGSLTTGANGLRFTTANP-- 114
PputW619_0838 AGQSAVCTGN-GPQATAIASVAAARNGHTP---GSPLVASCGYLQTGANSLRFTTSDN-- 109
PSPPH_4415 AGRRGTCSG--AATAPGFATQSATRNNGFTPNLTGGRTLTTLCGTLTVGLQSQRVFVADS-- 116
. : . * . * . * . * . . * . * . * : . * * .

```

```

Pf101_0636 --ASTEAIRVVVSHTVPQSFAGAIGGLFGGAGR NATINLSATAVAAVPPP-LASLTIRST 172
PA4297 AAVANEAVHVEVTKSVPGSLVANLGGFLGGG--NANVDLRAEAVARRLPN--ATISAGTG 169
PA14_55820 AAAANEAVHVEVTKSVPGSLVANLGGFLGGG--NANVDLRAEAVARRLPN--ATISAGTG 169
PFL_0686 --AQAVAIRVIATHTPVISVASGVAALFTP GPINLTQLSATAVAAAPTPTVAQLSIRST 172
PputW619_0838 --ARNEAIRVDVSNVTTSFAAGIYILTQGGEVPLTSTLQAHAVASKPLPPQAMLSIRTT 167
PSPPH_4415 --TQALAIQVFAAHPVPRSIAAGIVALFEKTPSPANITISATAVAASAAP-LAALTIRSA 173
. * :*: * :*: * . . . : * . : * :*: * :*:

```

Pf101\_0636 ALSVDTGRSAVLNALFVGGLLGGNLSLSAASWNGLVNTNINLLGYLDRKLVDIG---LSAG 229  
PA4297 LASVNSGQSALLNPILSGLLGTHIDL SAAAYNGIADAKLSVLDILGADGMGLIGVDTSLG 229  
PA14\_55820 LASVNSGQSALLNPILSGLLGTHIDL SAAAYNGIADAKLSVLDILGADGMGLIGVDTSLG 229  
PFL\_0686 LGTVSTAQSSILNPLVGGMLGGSLSLSAVGWNGLLNTNINLLSYLNQLAINLG---VAAG 229  
PputW619\_0838 LATVDSRQSALLDGLLG-ALGGNVQLGLAGWKGIAATDLNVLNLDQLAVDLQ---LTVG 223  
PSPPH\_4415 AVTMDSTRAAILNPLIGSLLGGTLNLSVANWQGLASTDLSLLSYLNRLKTDLN---LTAV 230  
          ::: :\*: :. . \*\* :\*. . :\*: :. :\*: . \* . : :

Pf101\_0636 GYSEVLGNITIAVSQVLQVTAINVLDPNGTLSATATILGLQAIKAAAGATQVVLGNLLKVVQA 289  
PA4297 TIEQLLNTNVGLQQVLAASVNVLAKNGVASVEALRAQLVGVKSAT----LKLGDLLGLSA 285  
PA14\_55820 TIEQLLNTNVGLQQVLAASVNVLAKNGVASVEALRTQLVGVKSAT----LKLGDLLGLSA 285  
PFL\_0686 NYTQLLNTTTSVTQLIQAAITVVQANGATADILTAIGNLQVAAIN-AAPLKLGDIIQMOT 288  
PputW619\_0838 DYEQLLNADATATQLLEAAVKVLEQSGAAADIVTNLKGVALGAGN-STLLQLGDILDIQN 282  
PSPPH\_4415 GYSEVLNNTSVSVSKLIQSAINVLDPGATLNGTATIAGLQALKLAAGATTVLLGDVLSIQG 290  
          \*: . : : : : \* : . . . : : : \* : \* : . :

Pf101\_0636 GTQ--ATALAVDVRAFDLIQGFVQLANKQNGLVANQTINLG-VAQITASVQVLEPPQLSA 346  
PA4297 GEVNSMSQLDTAINALDLIMAVAQVANKN SAVAVNLGIPGLANARLTVVEPKRIVSGPPG 345  
PA14\_55820 GEVNSMSQLDTAINALDLIMAVAQVANKN SAVAVNLGIPGLANARLTVVEPKRIVSGPPG 345  
PFL\_0686 GLP--STALDANLQLFQLLQAVIQLSNSNSAVAATLPINVLGLANI TVQAKVIEPPQLSA 346  
PputW619\_0838 GTA--QAGLDASIQLLQLVQGVQLAASESAATADLPISVGLINGRVRCLKVIEPQQVSA 340  
PSPPH\_4415 SSD--LAALNTNLRLLDLVQGLAQLANDKGTGISTAAQINVGTLAQVNTFRFQVVEPPQLSA 348  
          . : \* . : . : \* : . . . \* . . . . . :

Pf101\_0636 IGNP-RLAAANP-LGPNRIYVKTAQVRTLLSVNLPLLDITILSLVNAVADLAGPLTNTLNA 404  
PA4297 QDES-----GAWRTEVRQSQVRLTADIDSGFLSILATTK----- 379  
PA14\_55820 QDES-----GAWRTEVRQSQVRLTADIDSGFLSILATTK----- 379  
PFL\_0686 IGNPALAKADPM--GANRIYVRTAQVRTLVRVNLSP-LVSGLSTAVGNLVAPLTPVLNS 403  
PputW619\_0838 VGDPE-----RTDELRVHTAQVRAMISLDLPLLNTVFGLVNAVLDLVSPLTNVNLN 390  
PSPPH\_4415 IGDPSKIDPLNPKTGANRIYVRTAQMRALVSINLPVLGTTITSLANTAGSVVGS LTPILNS 408  
          . . . \* : \* : \* : : . . :

Pf101\_0636 LLSLNLVGVIDSLTICALGAP-CQTPSIEVLPG-----PIRLDVALDVAANSYVTAFC 457  
PA4297 -----LQLAIEGASGAVWLKSMAC 398  
PA14\_55820 -----LQLAIEGASGAVWLKSMAC 398  
PFL\_0686 LLSLNLVATLGSALCLLGG-CEQLYPAIASS-----SEIDLSLDAGGAIAYVTDYSC 455  
PputW619\_0838 LLSLNLASTLESVLCLLGVP-CTVTDIVLVPDK-----LQLDIGLEVAEATARLDPQSP 443  
PSPPH\_4415 ALSLNIAGLVTSATCAVGLNSCMVTDKFLTS DSSASAGPRIDL SLSLASADTYVTGYTC 468  
          : : : . . . : :

Pf101\_0636 LTPTN--KTLTNTTTSVANLKI GRMDPAAVFGSNVTPPAVVVQPLKVIDIGVKTCCRFL 515  
PA4297 TRPDT---ALDFGWRSSGATIKIGSPANIDQVGS-----IL 431  
PA14\_55820 TRPDT---ALDFGWRSSGATIKIGSPANIDQVGS-----IL 431  
PFL\_0686 PVNNSGKSLTAHAISSIADLVKQIDPANAFSSAAEP---VVKPLPLVDLGI RTCYQFL 512  
PputW619\_0838 DTFRCSPKRLTVQAQSAAKLAVGRFDSTNAFFTGT---AVKALPLIDIGTKRCKLL 500  
PSPPH\_4415 TSNTS--KTLVKTDAGLLSAKVGWIDSTAAFPASTDPSAITALPLPVL DIGTKTCQKIA 526  
          \* : . : \* : . . . :

Pf101\_0636 VLPVSCDPRVAVGGGLDISADTTVGQN--ANIPHVYSAP-PAAS-LPEINQPPFYYSYS 571  
PA4297 VLGG LVR-----LDLKLDTSIAGS-----SGDTRFNVKAD 461  
PA14\_55820 VLGG LVR-----LDLKLDTSIAGS-----SGDTRFNVKAD 461  
PFL\_0686 VLPGRCDPVVHYAGGGI AVMVNTSVAQN---TQDLV FSSSASPFPIPPNVNQTPT YQTAA 569  
PputW619\_0838 IL-GTCE SRIPYAGGGLGRVDSKLLGSGPVEHPLVFQG---PVSEPPNIGQPAAYLNMR 556  
PSPPH\_4415 GLLGNCTARTPFGGGGIGLTFD TVSQSP---LGSSTV VSTT-FSSPNLPEINSAPYFLTSV 583  
          \* : : : : . . . . :

Pf101\_0636 TG--NVVSSLSD-TLNNLNLNMHGPT-----GSLVSGLGAILSSVKTLLVTTINTVLSPL 623  
PA4297 GSDLVQSRRLPESGFLASTLKT SINVPVVLG LCLPLLCGSTALLDLIVNSV VAPLVDGL 521  
PA14\_55820 GSDLVQSRRLPESGFLASTLKT SINVPVVLG LCLPLLCGSTALLDLIVNSV VAPLVDGL 521  
PFL\_0686 PT-TNIVNSLAG-TLAGINLIVYKPVNNPLGAI VTGLAS AISGVSNLLTPLITGLLSPL 627  
PputW619\_0838 PVNDNVVGSLSLSD-TLLGVQLQAFKPTANSGLGDV LVIAGNVLGT VKGIEPLIRGLLSPL 615  
PSPPH\_4415 AH--TKPSTLLNGTVSSVKNVYKPTANSVGLGNVITGAAATLNSLTVALDAIVENTITGL 641  
          \* . : : . \* : : . : : \* :

```

Pf101_0636      LDTLINTLLMALGINLNQVDVGANLSC-QSGRATLVI 659
PA4297          LTPILNLVLPPLLGVQLG--YIDAEILKVDVGRAELLI 556
PA14_55820     LTPILNLVLPPLLGVQLG--YIDAEILKVDVGRAELLI 556
PFL_0686       LDPLLNNLLSGLGINLMDVEVGANLTCGQTGKAYLVI 664
PputW619_0838 IDPLVNVLLKVLGIDLVNTDVGANLSC-STGRAQLVL 651
PSPPH_4415     LTSVVDPLFESLGLSLGDADVGANLSC-NIGQATLII 677
: .: : : : * : . * : . : * : : . * : * * : :

```

| SeqA Name       | Len(aa) | SeqB Name       | Len(aa) | Score |
|-----------------|---------|-----------------|---------|-------|
| 1 Pf101_0636    | 659     | 2 PA4297        | 556     | 29    |
| 1 Pf101_0636    | 659     | 3 PA14_55820    | 556     | 30    |
| 1 Pf101_0636    | 659     | 4 PFL_0686      | 664     | 48    |
| 1 Pf101_0636    | 659     | 5 PputW619_0838 | 651     | 42    |
| 1 Pf101_0636    | 659     | 6 PSPPH_4415    | 677     | 45    |
| 2 PA4297        | 556     | 3 PA14_55820    | 556     | 99    |
| 2 PA4297        | 556     | 4 PFL_0686      | 664     | 30    |
| 2 PA4297        | 556     | 5 PputW619_0838 | 651     | 28    |
| 2 PA4297        | 556     | 6 PSPPH_4415    | 677     | 29    |
| 3 PA14_55820    | 556     | 4 PFL_0686      | 664     | 30    |
| 3 PA14_55820    | 556     | 5 PputW619_0838 | 651     | 28    |
| 3 PA14_55820    | 556     | 6 PSPPH_4415    | 677     | 28    |
| 4 PFL_0686      | 664     | 5 PputW619_0838 | 651     | 46    |
| 4 PFL_0686      | 664     | 6 PSPPH_4415    | 677     | 41    |
| 5 PputW619_0838 | 651     | 6 PSPPH_4415    | 677     | 37    |



Pf101\_0637 ADCADGALVNHVHPDDRAAYFERTRQLLREGSVSTRYRMLDTQGNTHWLLDEAKLLRDDL 526  
PA14\_55780 QGQSWQALAEERVHPDDLEAFFARGRELLREGRVKTRYRLADGQGNWHWLYDEAKLLRDAQ 533  
PA4293 QGQSWQALAEERVHPDDLEAFFARGRELLREGRVKTRYRLADGQGNWHWLYDEAKLLRDAQ 533  
PFL\_0687 ADCTAQLAEWVHPDDRDLYFQRCRQLLREGSVHTRYRLDRHGVIYHWLDEAKLLRDDL 502  
PputW619\_0839 DSELARQPGQAVHPDRALWLERTRTLRLRDGQVRSRYRLRDHLGGYHWLDEARLLRDDL 499  
PSPPH\_4416 ADCVDGQLAEYIHPEDRDIFERNRQLLRGGVSVRRYRLRNKNGHYHWLDEARLLRDDL 536  
.:\*\*.\* ::\* \*\* \*\* \*\* \*\* \*\* \*\* \*\* \*\* \*\* \*\* \*\*\*\*: : \* \*\* : \*\* :\*\*\*

Pf101\_0637 GLPVEAVGLWLDVTDATLAAERIKTSEERYRILVEDSPAMICRYRPDLTLTFGNRPLAMY 586  
PA14\_55780 GLPSEAVGLWLDVTEQHLLAAQRIASEERYRVLVEDSPALICRYTADLVLTIVNRTFADS 593  
PA4293 GLPSEAVGLWLDVTEQHLLAAQRIASEERYRVLVEDSPALICRYTADLVLTIVNRTFADS 593  
PFL\_0687 GLPVEAVGLWLDVTEATLAAEQVRQSEERYRILVEDSPAMICRYRPDLTLTFGNRPLAAY 562  
PputW619\_0839 GQPVVAVGLWLDVSEATEAAERVQRSEERYRVLVEDSPAMICRYTPDLQLLFGNRPLAEQ 559  
PSPPH\_4416 GMPVEAVGLWLDVTEATLAAEHVQRSEERYRILVEDSPAMICRYSPDLVLSFGNRPLANY 596  
\* \* \_\*\*\*\*\*: : \*\*:: \*\*\*\*\*:\*\*\*\*\*:\*\*\*\*\*\_\* \* : \*\* :\*

Pf101\_0637 LECAPEQLPGVNLGSWMSDEQREAFVQRLAQLTPDAPVSSAEINLRPLGREHAWWIWSDR 646  
PA14\_55780 LATSPELVGRRLDEWLAEDASALRARLLGSPREGASEVPELRFNLPQRFLLWLVWAER 653  
PA4293 LATSPELVGRRLDEWLAEDASALRARLLGSPREGASEVPELRFNLPQRFLLWLVWAER 653  
PFL\_0687 LECAPEELPGSNLQWLSAEQREGFERRLKLLSPEYVSTAEINLQLPGREHAWWVWSDR 622  
PputW619\_0839 LECTPEQLSEMNLQWMSDEQRSLFIQRLAALTPEQLGSAEICLQLPGRHAWWVWAER 619  
PSPPH\_4416 MECTPEQLTGINLGDWLSDEQREAFIRRIQGLTPQAPVSTAEICIELPGREYAWWVWADR 656  
: :\*\*.\* \*..\*:: : .: \* . : . \* : : \*\* :.. \* : : \*\*

Pf101\_0637 GVFDQGRLLLEVQAVGRDNTQVRRSQQLTQSAKMATLGEMATGLAHEINQPLNVMRMAI 706  
PA14\_55780 PLFDARGELCEVQAVGRDNTPVRRQQQLAQGAKMASLGEMVSGLAHEVKQPLHVLRLMTL 713  
PA4293 PLFDARGELCEVQAVGRDNTPVRRQQQLAQGAKMASLGEMVSGLAHEVKQPLHVLRLMTL 713  
PFL\_0687 GVFDQGRLLLEIQAVGRDNTQVRRSQQLTQSAKMATLGEMATGLAHEINQPLNVMRMAI 682  
PputW619\_0839 GLFNEQQLLEVQAVGRDNTQVRRSQQLMAGAKMATLGELATGLVHEINQPLNVMRLAI 679  
PSPPH\_4416 GIFDEHGTLVQAVGRDNTDVRRSRMQLNQSAMATLGEMSTGLAHEINQPLNVMRMAV 716  
:\* : \* \* :\*\*\*\*\* \*\*:: : \* \* \_\*\*\*\*\*:\*\*\* : \*\*\_\* : :\*\*\*:\*\*\*:\*\*\*:\*\*\*:\*\*\*

Pf101\_0637 VNVLKRLLGNGDVQIDYLTDKLNRIDTQVQRAARVVDHMRVFGRRSEIEQHFPNPLDAIEG 766  
PA14\_55780 FNMRQRMNSVGLDGDYLGKLERMDAQLRVDRVSHLGVFSRKSALALPFDPYAAFEG 773  
PA4293 FNMRQRMNSVGLDGDYLGKLERMDAQLRVDRVSHLGVFSRKSALALPFDPYAAFEG 773  
PFL\_0687 VNVLKRLLGNGDVQIDYLTDKLKRIDAQVQRAARVVDHMRVFGRRSEVEQQFPNPAHAIEG 742  
PputW619\_0839 ANTLKRVEGSGVVEVEYLTGKLRIDAQVGRVARLVEHMRTYGRRSALAHQVFAAWTAVDG 739  
PSPPH\_4416 VNVLKRLLGRGDVIEYLTGKLRNRIDTQVQRAARVVDHMRVFGRRSEVEEHLFDPAQAVEV 776  
\* :\*: : : \*\* \*\*\*\*\*:\*\*\*\_\* . \* : \* : : \*\* : \* \* . \* . :

Pf101\_0637 TLLSLEGLRGKGVLELRIGEANFQLQVRGYVDQLEQVLINLMVNARDALLSKRESNRDFQ 826  
PA14\_55780 ALGLLGEGLRQHAIEVECPAPTQRMVVRGQADQLEQVIINLLANARDALLGNPGLASR-R 832  
PA4293 ALGLLGEGLRQHAIEVECPAPTQRMVVRGQADQLEQVIINLLANARDALLGNPGLASR-R 832  
PFL\_0687 TLLSLLAEGMRGKGLELRISLGFVQVLFVVDQLEQVLINLLVNARDALLGKQEKQHDFFK 802  
PputW619\_0839 AVALLAEGLRGKGVALLQVEEPPDFCPEVQGHEDQLEQVLINLMVNARDALLERQVAS---- 795  
PSPPH\_4416 TLLSLLAEGMRGKGVLRVGTMIEDVQVRGHVDQLEQVLINLMVNARDALLSRRKDRDFE 836  
: : : \* \_\*\* : : : . \* \* \*\*\*\*\*:\*\*\*:\*\*\*\*\*

Pf101\_0637 PWIAVHAEHDEHVRLWVEDNNGGIDPRLLEIFEPFFTTKPVGVTGLGLSVSYGIVEN 886  
PA14\_55780 VRLEQVACREPGWVLEHVHDNNGGIEPLLEIFEPFFTTKAEKGTGLGLSVSHDLVRN 892  
PA4293 VRLEQVACREPGWVLEHVHDNNGGIEPLLEIFEPFFTTKAEKGTGLGLSVSHDLVRN 892  
PFL\_0687 PWIAVYQORDEQWVRLWVEDNNGGIDPRLLEIFEPFFTTKPVGIGTGLGLSVSYGIVQN 862  
PputW619\_0839 PRIGICQRIEQQLCLQVEDNAGGIDPCLIERIFEPFFTTKPAVGTGLGLSVSFGIVEA 855  
PSPPH\_4416 PWISVEAERDENIIRLAVQDNGGIDPRLLEIFEPFFTTKPVGVTGLGLSVSYGIVDQ 896  
: : : \* \_\*\* \*\* \*\* \*\* \*\* \* :\*\*\*\*\*\_\* \*\*\*\*\*:\*\*\*

Pf101\_0637 MGGRLSVFNGDDGARFCIELPIALDDQITSVARPD 921  
PA14\_55780 MGGSLTAAHQEGALFVVRPLAAPAEAGG----- 922  
PA4293 MGGSLTAAHQEGALFVVRPLAAPAEAGG----- 922  
PFL\_0687 MGGRLSVNSQD GARFCIELPIAEDQITR----- 892  
PputW619\_0839 MGGRLAALNGVDGACFRVLLPIYNTN----- 881  
PSPPH\_4416 MGGQLSVGNVGEARFQIELPIFNAG----- 922  
\*\*\* \* . \* :\*\* \* : \*\* :

| SeqA Name       | Len (aa) | SeqB Name       | Len (aa) | Score |
|-----------------|----------|-----------------|----------|-------|
| 1 Pf101_0637    | 921      | 2 PA14_55780    | 922      | 40    |
| 1 Pf101_0637    | 921      | 3 PA4293        | 922      | 40    |
| 1 Pf101_0637    | 921      | 4 PFL_0687      | 892      | 72    |
| 1 Pf101_0637    | 921      | 5 PputW619_0839 | 881      | 52    |
| 1 Pf101_0637    | 921      | 6 PSPPH_4416    | 922      | 60    |
| 2 PA14_55780    | 922      | 3 PA4293        | 922      | 99    |
| 2 PA14_55780    | 922      | 4 PFL_0687      | 892      | 41    |
| 2 PA14_55780    | 922      | 5 PputW619_0839 | 881      | 35    |
| 2 PA14_55780    | 922      | 6 PSPPH_4416    | 922      | 38    |
| 3 PA4293        | 922      | 4 PFL_0687      | 892      | 41    |
| 3 PA4293        | 922      | 5 PputW619_0839 | 881      | 36    |
| 3 PA4293        | 922      | 6 PSPPH_4416    | 922      | 38    |
| 4 PFL_0687      | 892      | 5 PputW619_0839 | 881      | 52    |
| 4 PFL_0687      | 892      | 6 PSPPH_4416    | 922      | 63    |
| 5 PputW619_0839 | 881      | 6 PSPPH_4416    | 922      | 50    |

**Pf101\_1000 (overlaps nov3)**

```

Pf101_1000 MYKLAFVFPDSHVEVVKAVFAAGGGRIGDYDHCWQVLGSGQFRPLDGSQPFIGQAGQV 60
PA14_15770 MYKLCFYVPESHLDVVKQAVFAAGGGRIGAYDSCCWQSLGQGQFRPLDGSQPYLGQVGQV 60
PA3762 MYKLCFYVPESHLDVVKQAVFAAGGGRIGAYDSCCWQSLGQGQFRPLDGSQPYLGQVGQV 60
PFL_1077 MYKLSFFVPPSHVESVKS AVFAAGGGRIGAYDQCAWQVLGQGQFRPLDGSQPFLGQTGQV 60
PputW619_4188 MYKLAFVFPASHVDVVKAAVFAAGGGRIGGYDHCWQTLGHGQFRPLDGSQPFLGQTGQV 60
PSPPH_1342 MYKLAFVFPASHVDEVKSAVFAAGAGRIGAYDHCSWQVLGQGQFRPLNGSQPFVGSQGVV 60
****_*:** **:: ** *****_***** ** *_** ** *****:*****:** ** *

```

```

Pf101_1000 ERVEEWKVELVVGDELIRSVVAALKLSHPYETPAYEVWRLEDF-- 103
PA14_15770 EHVAEWKVELVVADELIHASVKALKAAHPYETPAYEVWRLTDMVF 105
PA3762 EHVAEWKVELVVADELIHASVKALKAAHPYETPAYEVWRLTDMVF 105
PFL_1077 ERVEEWKVELVVADELIRDLVLALKQSHPYETPAYEVWRLEAF-- 103
PputW619_4188 EVVEEWKVELVVADDLIAQVVAALRQSHPYETPAYEVWRLADF-- 103
PSPPH_1342 ESVEEWKVELVVADDLIQQAVLALKQSHPYETPAYEVWRLEEF-103

```

```

* * *****_*:** ** **::*****
SeqA Name          Len(aa)  SeqB Name          Len(aa)  Score
=====
1 Pf101_1000        103      2 PA14_15770        105      75
1 Pf101_1000        103      3 PA3762            105      75
1 Pf101_1000        103      4 PFL_1077          103      85
1 Pf101_1000        103      5 PputW619_4188    103      84
1 Pf101_1000        103      6 PSPPH_1342       103      79
2 PA14_15770        105      3 PA3762            105     100
2 PA14_15770        105      4 PFL_1077          103      77
2 PA14_15770        105      5 PputW619_4188    103      76
2 PA14_15770        105      6 PSPPH_1342       103      73
3 PA3762            105      4 PFL_1077          103      77
3 PA3762            105      5 PputW619_4188    103      76
3 PA3762            105      6 PSPPH_1342       103      73
4 PFL_1077          103      5 PputW619_4188    103      82
4 PFL_1077          103      6 PSPPH_1342       103      84
5 PputW619_4188    103      6 PSPPH_1342       103      81
=====

```

**Pf101\_2430 (overlaps nov4)**

No predicted orthologs in *Pseudomonas* genomes; no matches in GenBank.

**Pf101\_2664 (overlaps nov6)**

No predicted orthologs in *Pseudomonas* genomes; there are matches in GenBank.

```

Pf101_2664      MEQFKQFNASKTEVIKSLDNLQKLVGALEALGLDVSQDIEKIRKAIQDVQSDALRIALLG 60
Shewana3_2033  MEQLKQFEVEKQSAISTLQQLKEVLTELGAIQMDVSVDIQKLEAALNTIKDDVLRRIALLG 60
E. coli_LeoA   MEQFKQFSIEKQAAINSLLQLRGMLEMLGEMGINISDDLQKVTSAINAIESDVLRIALLG 60
SELSPUOL_01925 MEKLERLSDWEACAKRRYLAVQEKMEELHDLNVDCAE DLQKIEDKLGSMGQEKISLALVG 60
BACCELL_05373 METSKNSGNEKQ---HRLIALKSLVEKGITLGLDLTDVLEKIENVIKSSKDNIIRMVLLG 57
**   .:   :           :: :   : : : : : : : : : : : : : : : : : : : : : : :

```

```

Pf101_2664      AFSDGKTSVVAGWLGQVMKDKIDTNESSDALAIYRPDNLQDRCEIVDTPGLFGDKKAA 120
Shewana3_2033  AFSDGKTSVIAAWLGKIMADMKIDMDESSDRLAIYRPEGLPDKCEIVDTPGLFGDKQKED 120
E. coli_LeoA   AFSDGKTSVIAAWLGKIMADMNISMDDESSDRLSIYKPEGLPDQCEIVDTPGLFGDKKEREV 120
SELSPUOL_01925 AFSDGKTSVIAAGLFGVEELGDMQISVDEESTDEIQIYE PNNPKISCRIVDTPGLFGTKEQR 120
BACCELL_05373  TFSDGKTSVVAGLLGKLEDSMKIDQDESSDELKVYRPNGLKEGFEIVDTPGLFGTKEKEV 117
:*****:* . : :   . : * . : * : * : : : * : * . : ***** : :

```

```

Pf101_2664      ENGALVQYGDITKNYISEAHLIFYVVDATNPLKESHQDIVRWVLRDLNKLSSSTIFVIN 180
Shewana3_2033  EN-LQIMYEDITRNYISEAHLILYVVDATNPLKESHQIVRWVLRDLNKLSSSTVFIN 179
E. coli_LeoA   DG-RLVMYEDLTRRYISEAHLIFYVVDATNPLKESHSDIVKWLRLDLNKLSSSTIFVIN 179
SELSPUOL_01925 SD-GVVQLGEIAKRYLAEAHMLLYVVE SKNPIKDSHKD TLRWIMKDLQKTDRMIFVIN 179
BACCELL_05373  DG-KNIRYSELTQKYISEAHVVIYVCDAVTPLKESHKDI IKLVMRDFNKLESTIFVIN 176
..   :   : : : : * : : * : : * : : * : : * : : * : : * : : * : : * : : * :

```

```

Pf101_2664      DEV-ADLRDAEEFEQQSTIKKNNLLDKLQRFVDLSAAERDAINVVCVASNPNRGLF 239
Shewana3_2033  DEV-TDLSDFTLFSEQAAIKTETLKEKLRRAASLTDEEVKALRIVCIASNPNRGLP 238
E. coli_LeoA   DEV-TSLTDQALFDEQAAIKKANLKGKLRRAADLTAECEQLNIVCVASNPNRGLTY 238
SELSPUOL_01925 DDV-ADLSDEEEFLSQAAIKKEAVREKLRRELVGVRADDAKVRIVCIAADPDRRGMDF 238
BACCELL_05373  DEAGTMDLDEEDYNEMSSIKKDNLLKRLRDTIGLTAEESKMRACVAADPKGKGLKH 236
* . . : : * : : : : * : : : : : : : : : : : : : : : : * : :

```

```

Pf101_2664      EQKDLYDQFRSRISELKVVTQQVLDGSGRET LIKKTGIDVVRDVLGKKIALAQDEL 299
Shewana3_2033  EKLDVYRNRSRIDELKKTTSILDSVSRSTIIAKTGIDVVAGVVSQRVLAQNSLDE 298
E. coli_LeoA   TKPEHYESRSRINDLNKNAATEILKTNVPEVLLVKTGM DVVKDIVIQRVTLASRHL 298
SELSPUOL_01925 EHTDVYEKRSHIVDLEDAIEGVLQKHSAEFFANAALGVCKAVLGRYIEEVPTFVKA 298
BACCELL_05373  TDMDGYLKRSHIEVLEREYISSITDLDTDAAKNNAKTAVIKDVLSSMSKRVDAVF 296
. : * . * : * * . : . : . : : * : : : . : .

```

```

Pf101_2664      LADNQRRDSARIQEDIAEGKRKVLATVGNLYEELNNE TDLNLSIRTLPRDQVRAF 359
Shewana3_2033  FAKQREQECERIREDLNNGKREVKRLAGQLFNELEGLEKQLMGKLRPLDFEDIRPF 358
E. coli_LeoA   FVEKNDEDMHRFSNDIKQSRIEVKRLAGELFEELNLMEKQLMSQLRPLDLDIRPF 358
SELSPUOL_01925 MREKLAESVSRQEAQFQETRKHLLLAGEECWEE LAAYRQLLDGIHALSLESAEKF 358
BACCELL_05373  ALRRYDDELKDMNNDLNLK GELNQS KAIMTERLNDLKKSIKMDINNATQNSFGT 356
. . : * : : : : : : * : : : : : : : : : : : : : : :

```

```

Pf101_2664      IGFSNNDIG-EKLRFRIDHLFSTAFNQSSSIMSGISAKIEHQLDSSSDFADSITAS 418
Shewana3_2033  IGYTDQNDIG-YKLSIKIKTIVDSYDQTSLITSRLNQE INSQLDSSSFLDSLGS 417
E. coli_LeoA   LGYTEDGVG-FKLHLRIKQSVDRFFEQSTAVSQRLSDDITRQLSSSESFLSGLG 417
SELSPUOL_01925 FGRSGDTIG-KHFEQQLTHIMEKHLGRMREDIETFKKKFEQETDVQSNIFLGLGR 417
BACCELL_05373  LGMEDKKVTGYILLRKVNQILSECAEKNNATLSMKEIDFNLRFDKQDSMLKDV 416
:* . : : : : : : : : : : : : : : : : : : : : : :

```

```

Pf101_2664      SSRALTAVSKIPVESIKSGVFLARETLKNTLGYVYKFKPWEATKLAANISRWAGPI 478
Shewana3_2033  VGSGLSNVKISPDAIKATIFVARDLLAKTTGVVYKFKPWQASKLAAGISKWAGPA 477
E. coli_LeoA   LGGAFKGVSKISPATLKT TILAARDTIGKLTGYVYKFKPWEATKLAGSIKWAGP 477
SELSPUOL_01925 IKYIP---PTKMVDFAKGI FIGRDLKRRIG-IIIKFKPWQVVKFAKAVPILT--- 469
BACCELL_05373  LG-----KVNISEGMVKAARDIFAKS----YKFKPWGAVNLGKSMTKLAKVGG 463
: . * : : . ***** . : : . : : : :

```



```

Pf101_2664      QVLTDVISVAQQQRAETELKQLQGDIAEVVVKSYFAEPMKLLMDHEKVMDFAPQIKAFEK 538
Shewana3_2033  SLTADFYNAKASELEAELKETKNEISTMIKEAFKDLVDIVSDDQKLFDFAPQLKIFDQ 537
E. coli_LeoA   TIGSDLWDAYKAHEREQELKEVKASLAKIIKEPFEDIYDVLSSDEKMFAPQIQQMEQ 537
SELSPUOL_01925 ELLMLVVDALVQSKRDARLKEKELKETLLQGVEETFQEIQSTLQG-DALFENYVPDFLSVQS 528
BACCELL_05373 ALAIEVVSFISAARNEKKLKDLDKADIVGEVDKIFKSI FEMFDKDDKYYENFASSYIEMTK 523
      : . . . . : .** : : : : . . * . . . : : . . . . .

```

```

Pf101_2664      ILVEQEASLDDLNRNRQTQLAELETHLSQAFDSQNVIEGEYGVV 581
Shewana3_2033  LITDTEsqVKDIRVSQNSLRGISEKLSLPSY----- 569
E. coli_LeoA   VVTELAEKsQAIRDNRQKLSLIQTQLAQLMVPATENHTAR--- 577
SELSPUOL_01925 DLEAAQKELQDLKENMRLAVWTEAAKELQLGLENLR----- 565
BACCELL_05373  RLHARMQeISVMRHkVANLEDYGRSLKDWFKEDAEDADFEeI- 565
      : . . . : : * .

```

| SeqA Name       | Len (aa) | SeqB Name       | Len (aa) | Score |
|-----------------|----------|-----------------|----------|-------|
| 1 Pf101_2664    | 581      | 2 Shewana3_2033 | 569      | 48    |
| 1 Pf101_2664    | 581      | 3 E.            | 577      | 45    |
| 1 Pf101_2664    | 581      | 4 Selenomonas   | 565      | 30    |
| 1 Pf101_2664    | 581      | 5 Bacteroides   | 565      | 30    |
| 2 Shewana3_2033 | 569      | 3 E.            | 577      | 57    |
| 2 Shewana3_2033 | 569      | 4 Selenomonas   | 565      | 29    |
| 2 Shewana3_2033 | 569      | 5 Bacteroides   | 565      | 31    |
| 3 E.            | 577      | 4 Selenomonas   | 565      | 28    |
| 3 E.            | 577      | 5 Bacteroides   | 565      | 32    |
| 4 Selenomonas   | 565      | 5 Bacteroides   | 565      | 27    |

**Pf101\_2848 (overlaps nov7)**

Pf101\_2848 MKITVFGSGYVGLVQAAVLAIEVGHDDVCMIDIDEKKIELLRQGHVSIFEPGLASLVREGLD 60  
PA14\_18300 MKISVFGSGYVGLVQAAVLAIEVGHDDVLCMDIDRNKVERLAQGLASIYEPGLDALLREGLD 60  
PA3559 MKISVFGSGYVGLVQAAVLAIEVGHDDVLCMDIDRNKVERLAQGLASIYEPGLDALLREGLD 60  
PFL\_3050 MKISVFGSGYVGLVQAAVLAIEVGHDDVICMDIDEQKVKQLQGHVSIFEPGLASLVKENLE 60  
PSPPH\_2809 MRISVFGSGYVGLVQATVLAIEVGHDDVCMIDIDQAKIDQLRQGVHIYEPGLANLVRDNL 60  
\*.:\*\*\*\*\*:\*\*\*\*\*:\*\*\*\*\*. \*.: \* \* . \*:\*\*\* \*::.\*:

Pf101\_2848 AGRLOFTCDEILAVQHGVAFIAVGTSPNEDGSADLRVLSVGDVAVARHREKPLILVEKS 120  
PA14\_18300 SGRLLRFSSDARLAVEHGRVQFIAVGTTPGEDGAADLGAVFAVADAIAEHRRKPVIVVEKS 120  
PA3559 SGRLLRFSSDARLAVEHGRVQFIAVGTTPGEDGAADLGAVFVADAIAEHRRKPVIVVEKS 120  
PFL\_3050 AKRLHFTHDEKLAVQHGVLFIAVGTSPSEEDGSADLRVLSVGDVAVARHREQPVILVEKS 120  
PSPPH\_2809 HERLHFTTDERLAVEHAELVLFIAVGTSPRADGSADLGGFFAVGEAIARHRCEPLIIVEKS 120  
\*::: \* \*:::.\* \*\*\*\*\*. \*:::\*\*\* .: \*.:\*\*\*.\* \*:::\*\*\*

Pf101\_2848 TVPVGTDGTLFAHLDKALVAGRLQLQFDIVSNPEFLKEGSAVADCRRPDRIVIGCEREV 180  
PA14\_18300 TVPVGTDRLRAHIERRLEADGRELEFEIVSNPEFLKEGSAVADCRRPDRIVVGCNNEV 180  
PA3559 TVPVGTDRLRAHIERRLEADGRELEFEIVSNPEFLKEGSAVADCRRPDRIVVGCNNEV 180  
PFL\_3050 TVPVGTDTLKAHIEKVLDD--GRALQFDIVSNPEFLKEGSAVTDCRRPDRIIGCEREV 178  
PSPPH\_2809 TVPVGSDALRGHIDKVLRAQGRLLQFDIVSNPEFLKEGSAVNDCRRPDRIVIGCENEV 180  
\*\*\*\*\*:\* \*.:\*\*\*: \* \*\* \*:::\*\*\*\*\* \*\*\*\*\*:\*\*\*:.\* \*

Pf101\_2848 RDVMRDLYSPFNHNDRIMFMDLRSaelTKYAANCLATKISFINQIAELAEHLGADIES 240  
PA14\_18300 RQVMRELYEPFNHNDRMLFMGLRSaelTKYAANGMLATKISFINQIAELAEHLGADIEA 240  
PA3559 RQVMRELYEPFNHNDRMLFMGLRSaelTKYAANGMLATKISFINQIAELAEHLGADIEA 240  
PFL\_3050 RDVMRDLYAPFNHNDRIMFMDLRSaelTKYAANCLATKISFINQIAELAEHLGADIEA 238  
PSPPH\_2809 RKVMRELYAPFNHNDRIMFMDLRSaelTKYAANCLATKISFINQIAELAEHLGADVES 240  
\*.:\*\*\*:\*\*\* \*\*\*\*\*:\*. \*\*\*\*\* \*\*\*\*\* \*\*\*\*\*:\*\*\*:.\* :

Pf101\_2848 VRQIGADSRIGYHFIYPGCGYGGSCFPKDMRALIHSAAEHCSSDLLQAVEAINRRQKH 300  
PA14\_18300 VRQIGADPRIGYHFIYPGCGYGGSCFPKDMRALIHSAAEQHCSSDLLQAVEAINRRQKH 300  
PA3559 VRQIGADPRIGYHFIYPGCGYGGSCFPKDMRALIHSAAEQHCSSDLLQAVEAINRRQKH 300  
PFL\_3050 VRLGIGADTRIGYHFIYPGCGYGGSCFPKDMRALIHSAAEQHCSSDLLQAVEAINRRQKH 298  
PSPPH\_2809 VRLGIGADSRIGYDFIYPGCGYGGSCFGKDIRALIHSAAEHCSSNDLLSVVEAINRRQKN 300  
\*\* \*\*\*\*\*.\*\*\*.\*\*\*\*\* \*\*\*\*\* \*.:\*\*\*\*\* .:\*\*\*.\*\*\*.\*\*\*\*\*.\*\*\*:

Pf101\_2848 KLFERINAFYKGLRGKTFALWGLAFKPNDDMRDAPSRVLLSALWAAGANVRAFDPEAM 360  
PA14\_18300 KLFERIRVFYDGLRGKTFALWGLAFKPNDDMRDAPSRVLLSALWAAGANVRAFDPEAM 360  
PA3559 KLFERIRVFYDGLRGKTFALWGLAFKPNDDMRDAPSRVLLSALWAAGANVRAFDPEAM 360  
PFL\_3050 KLFERIKAFYKGLKRGKTFALWGLAFKPNDDMRDAPSRVLLDALFAAGANVRAFDPEAM 358  
PSPPH\_2809 KLFERNVAFYQDGLRGKTFALWGLAFKPNDDMRDAPSRVLLSALWEAGANVRAFDPEAM 360  
\*\*\*\*\*:..\*.\*.:\*\*\*:\*\*\*\*\*:\*\*\*\*\* \*\*\*\*\* \*::: \*.:\*\*\*:\*\*\*\*\*

Pf101\_2848 QETQNLYPDESRLMLMGTPEVSLVGLDADALICTEWQQFKAPDFDLIQRLKAPVIFDGRN 420  
PA14\_18300 QETQRLYGHDERLSLMGTPEATLGGADALVICTEWQQFKAPDFELLKERLKAPVIFDGRN 420  
PA3559 QETQRLYGHDERLSLMGTPEATLGGADALVICTEWQQFKAPDFELLKERLKAPVIFDGRN 420  
PFL\_3050 QETQRLYPDESRLMLMGTPEVSLVGLDADALICTEWQQFKAPDFDLIQRLKAPVIFDGRN 418  
PSPPH\_2809 QETQRIYGRKDLILMGTPEVSLVNDADALICTEWQQFKAPDFELIQRLNAPIFIDGRN 420  
\*\*\*.:\* . \* \*\*\*\*\*:.\* .:\*\*\*:\*\*\*\*\* \*\*\*\*\*:\*\*\*:\*\*\*:\*\*\*\*\*

Pf101\_2848 LYDAERLARNGFHYFPMGRGERSLTLPIPLQWPHASDVA----- 459  
PA14\_18300 LYDPERMARHGFHYFPMGRGQSCSLPINEASLAQEDGVRLLRQA 464  
PA3559 LYDPERMARHGFHYFPMGRGQSCSLPINEASLAQEDGMRLLRQA 464  
PFL\_3050 LYDAERLARNGFTYFPIGRGERSNLPIPHQQWSEAA----- 454  
PSPPH\_2809 LYDTERLATRGFHYFPIGRGESCDLPIPKRWTPYDQLTSSQAI 464  
\*\*\*.\*\*\*:\* \* \*:::\*\*\*:\*\*\* \*\* \*

| SeqA Name    | Len (aa) | SeqB Name    | Len (aa) | Score |
|--------------|----------|--------------|----------|-------|
| 1 Pf101_2848 | 459      | 2 PA14_18300 | 464      | 76    |
| 1 Pf101_2848 | 459      | 3 PA3559     | 464      | 76    |
| 1 Pf101_2848 | 459      | 4 PFL_3050   | 454      | 87    |
| 1 Pf101_2848 | 459      | 5 PSPPH_2809 | 464      | 78    |
| 2 PA14_18300 | 464      | 3 PA3559     | 464      | 99    |
| 2 PA14_18300 | 464      | 4 PFL_3050   | 454      | 77    |
| 2 PA14_18300 | 464      | 5 PSPPH_2809 | 464      | 73    |
| 3 PA3559     | 464      | 4 PFL_3050   | 454      | 77    |
| 3 PA3559     | 464      | 5 PSPPH_2809 | 464      | 73    |
| 4 PFL_3050   | 454      | 5 PSPPH_2809 | 464      | 78    |

**Pf101\_3080 (overlaps nov8)**

Pf101\_3080 MSDILWQPDAKRIARSRMDGFRFINQRHHLKLDYYPALHQWSIDQREAFWQAIIVDFFGI 60  
PA14\_38690 MPAPLWSPSAERIAASRMEAFRRFVNQRHALGLADYYPALHAWSVQRREAFWQAIIVDFFEV 60  
PA1997 MPAPLWSPSAERIAASRMEAFRRFVNQRHALGLVDYYPALHAWSVQRREAFWQAIIVDFFEV 60  
PFL\_3577 MSDLLWQPSAERIGKTRMDAFRRFVNQRHGLNLHDYYPALHQWSIDQRESFWQAIIVDFFEV 60  
PputW619\_2720 MNDVLWCFAAAQIEASRMDAFRRWINLRYNLQLNDYAAALHGWVSEQRAAFWQSIADYFQV 60  
\* \* \* \* : \* : \* : \* : \* : \* : \* \* \* \* \* : \* : \* : \* : \* : \* : \* :

Pf101\_3080 SFHTQPDVAVLRGGLKMPGAEWFFPGATLNF AEHLRSRRDDAIAVIAIGENGQRELLTWAEI 120  
PA14\_38690 RFQQPPRAVLEEGTQMP SARWFFPGATLNF AEHLRRRRDDAPALIAVSEDRREVLSHAEL 120  
PA1997 RFQQPPRAVLEEGAQMP SARWFFPGATLNF AEHLRRRRDDAPALIAVSEDRREVLSHAEL 120  
PFL\_3577 SFHQPAECVLRREGPQMP SAQWFFPGATLNF AEHLKRRDDSVAVVAIENGQREQLTHAEI 120  
PputW619\_2720 LWHTPPSQVLSGAQMP DARWFAKATLNF AEHLRRRRDDHPAVTAMREDGQRRSLSHAQL 120  
: : . \* \* \* : \* : \* : \* : \* : \* : \* \* \* \* \* \* \* \* \* : \* : \* : \* : \* : \* : \* :

Pf101\_3080 AQQVAGFQASLQAAGVLVGDRIAACMPNTWQTLVAMLAATSLGAIWSCSSPDFGTHGVID 180  
PA14\_38690 ARHVAGLQKRLAALGIGPDRVAALMPNTWQTVVGMLATASLGATWSSCSPDFGTQGVID 180  
PA1997 ARHVAGLQKRLAALGIGPDRVAALMPNTWQTVVGMLATASLGATWSSCSPDFGTQGVID 180  
PFL\_3577 AAQVAGLQKRLAAGVGLDRVAACMPNTWQTLVGMLASTSLGAVWSCSSPDFGTQGVVD 180  
PputW619\_2720 AAEVAGLQKAFKNAGIEPDRIGAVMPNTWETLVAMLAATSLGAVWSTSSPEFGLHGIIID 180  
\* . \* : \* : \* : \* : \* : \* : \* : \* : \* : \* : \* : \* : \* : \* : \* : \* : \* :

Pf101\_3080 RFGQIEPKVLITCAGRYAGKEIDQTVKVNIEIQPLSQQLIIVPYARPOAHATDYRTP 240  
PA14\_38690 RFGQIEPRVLIACAGRYAGKSLDLTAKLNEVLAGLPGLEQLLVVPYDRPQAQPQDYRCQ 240  
PA1997 RFGQIEPRVLIACAGRYAGKSLDLTAKLNEVLAGLPGLEQLLVVPYDRPQAQPQDYRCQ 240  
PFL\_3577 RFGQIEPKVLITCAGRYAGKDIDQTAKNQILRPLSLEQLLVVPYARSQARAEDYRTP 240  
PputW619\_2720 RFGQIEPKLLIVCAGRYAGKQIDQVKNQVCTQLPGLQQLIVVPYTRPHTQADEFSTQ 240  
\* \* \* \* : \* : \* : \* : \* : \* : \* : \* : \* : \* : \* : \* : \* : \* : \* : \* :

Pf101\_3080 ANVTLWDDFYEPGDEPQFVVPFDPHPLYVLYSSGTTGVPKCIHSTGGVLLQHVKEHGLH 300  
PA14\_38690 ARVALWDGFYQAEGERPVPFVPFEPQLYILYSSGTTGVPKCIHATGGVLLQHLKEHGLH 300  
PA1997 AQVALWDGFYQAEGERPVPFVPFEPQLYILYSSGTTGVPKCIHATGGVLLQHLKEHGLH 300  
PFL\_3577 ASVSLWDDFYRPGGPEPFTVPFPAHPLYILYSSGTTGVPKCIHGTGGVLLQHLKEHGLH 300  
PputW619\_2720 AKVSLWDDFYQAGGEPFTPLPFDHPLYILYSSGTTGVPKCIHVSAGGVLLQHLKEHGLH 300  
\* \* : \* : \* : \* : \* : \* : \* : \* : \* : \* : \* : \* : \* : \* : \* : \* : \* :

Pf101\_3080 VDLGPGDRLFYTTTCGWMWNWLVSAVAVVLYDGSFPYDPNERLLELLDDEQVSVF 360  
PA14\_38690 TDLGDGDRLFYTTTCGWMWNWLVASGLAVGASLVLYDGSFPFHGPERLLDLIDAEDIAVF 360  
PA1997 TDLGDGDRLFYTTTCGWMWNWLVASGLAVGASLVLYDGSFPFHGPERLLDLIDAEDIAVF 360  
PFL\_3577 ADLGPGERLFYTTTCGWMWNWLVSAVAVVLYDGSFPFHGPERLNEHMLDLIDREIAISVF 360  
PputW619\_2720 NDLKADDVLFYTTTCGWMWNWLVASGLAVGATLVLYDGSFPFHGPERLLDLIDAEGTQAF 360  
\* \* . : \* : \* : \* : \* : \* : \* : \* : \* : \* : \* : \* : \* : \* : \* : \* :

Pf101\_3080 GTSKPKFLATLESSGIKPRESDLSHLRLLTLLTGSALSPQSYDFVYRDFKPDVCLSSMSGG 420  
PA14\_38690 GASAKYLAALEKAGVRPRHSHRLDLSRLTLLTGSPLAHESEFDYVYRELKSDLCLSSISGG 420  
PA1997 GASAKYLAALEKAGMRPRHSHRLDLSRLTLLTGSPLAHESEFDYVYRELKSDLCLSSISGG 420  
PFL\_3577 GTSKPYLAALEKAGSRPRQSHRLESRLTLLTGSPLSPQSYDYVYREIKSELCLASMSGG 420  
PputW619\_2720 GTSKPYLAALEQEGLEPARSHRLDLSRLILLTGSPLSPHSYDYVYAKIKADLCLASMSGG 420  
\* : \* : \* : \* : \* : \* : \* : \* : \* : \* : \* : \* : \* : \* : \* : \* : \* :

Pf101\_3080 TDIVSCFVNGNPMSAVRRGEIMGKSLMAVEVWVNDAGQPVVGEKGEVCTRSFPAPVIGI 480  
PA14\_38690 TDIVSCFAIGNPVLVWRGELQCKALGMAVEIWDGRRRLASGKGEVCTRHFPSPVIGI 480  
PA1997 TDIVSCFAIGNPVLVWRGELQCKALGMAVEIWDGRRRLASGKGEVCTRHFPSPVIGI 480  
PFL\_3577 TDIVACFVAGNPIQPVRGEMQKGLGMAIEVWVNDAGQPVVGEKGEVCTRHFPSPVIGI 480  
PputW619\_2720 TDIVSCFVLGNPTLPVRRGEIACKGLGMAVQVWNEHQPVVTEKGEVCTRHFPSPVIGI 480  
\* \* \* : \* : \* : \* : \* : \* : \* : \* : \* : \* : \* : \* : \* : \* : \* : \* :

Pf101\_3080 WNDPDGKLRKSYFSQFPGVWAQGDYAEQLPHGMLIHGRSDAVLNPGGVRICTAEIYRQ 540  
PA14\_38690 WNDPDGTRFHDAYFASFPVWAHGDYAEETAHGGVLIHGRSDAVLNPGGVRICTAEIYRQ 540  
PA1997 WNDPDGTRFHDAYFASFPVWAHGDYAEETVHGGVLIHGRSDAVLNPGGVRICTAEIYRQ 540  
PFL\_3577 WHDPDQSKLKASYFSLFPGVWAQGDYAEQLAEGGMLIHGRSDAVLNPGGVRICTAEIYRQ 540  
PputW619\_2720 WNDNDGSRVREAYFSQFPGVWAQGDYAEQLATGGMVLIHGRSDAVLNPGGVRICTAEIYRQ 540  
\* : \* \* : : \* : \* : \* : \* : \* : \* : \* : \* : \* : \* : \* : \* : \* : \* :

```

Pf101_3080 VEKVPQVLDSVAIGQQWQDDVRVLLFVHLKDGVTLDLTLQQQIRQVIFANTTPRHVPAKI 600
PA14_38690 VEKVEEVLESIAIGQDWQGDVRVLLFVRLRDGVRLEPLRERIRQTIANATPRHVPAKI 600
PA1997 VEKVEEVLESIAIGQDWQGDVRVLLFVRLRDGVRLEPLRERIRQTIANATPRHVPAKI 600
PFL_3577 VEKLEQVLESIAIGQSWEQDVRVLLFVRLQDGVLEDEALQEHIRQVIRSNTTPRHVPAKI 600
PputW619_2720 VEKVEQVLESVAIGQQWKGDVRVLLFVRLRDGLVLEDEPLQQRIRQVIRQYTTPRHVPAVI 600
***: **:*:***:*:*****_*: *****:***:*:***: **:.*::**_** :***** *

```

```

Pf101_3080 VAVTDIPRTISGKVVVELAVRNVVHGEPVKNTDALANPQALEQFRDRPELNS-- 651
PA14_38690 IQVADIPRTLSTGKIVELAVRNVIHGRPVKNTDALANPQALELYRDLAELRD-- 651
PA1997 IQVADIPRTLSTGKIVELAVRNVIHGRPVKNTDALANPQALELYRDLAELRD-- 651
PFL_3577 LAVTDIPRTISGKIVELAVRNVVHGLPVKNTDALANPEALEQFRDREELRH-- 651
PputW619_2720 LQVSDIPRTISGKLVLEAVRNVVHGLPVKNTDALANPEALEFFRDRTELHVQA 653
: *:*:***:*:***:*****:*** *****:***:***:***: **_**

```

| SeqA Name    | Len (aa) | SeqB Name       | Len (aa) | Score |
|--------------|----------|-----------------|----------|-------|
| 1 Pf101_3080 | 651      | 2 PA14_38690    | 651      | 68    |
| 1 Pf101_3080 | 651      | 3 PA1997        | 651      | 68    |
| 1 Pf101_3080 | 651      | 4 PFL_3577      | 651      | 77    |
| 1 Pf101_3080 | 651      | 5 PputW619_2720 | 653      | 69    |
| 2 PA14_38690 | 651      | 3 PA1997        | 651      | 99    |
| 2 PA14_38690 | 651      | 4 PFL_3577      | 651      | 73    |
| 2 PA14_38690 | 651      | 5 PputW619_2720 | 653      | 70    |
| 3 PA1997     | 651      | 4 PFL_3577      | 651      | 73    |
| 3 PA1997     | 651      | 5 PputW619_2720 | 653      | 70    |
| 4 PFL_3577   | 651      | 5 PputW619_2720 | 653      | 71    |

**Pf101\_3654 (overlaps nov11)**

```

Pf101_3654      MSLP SQVRLIEVGP RDGLQNEAQPI SVADKVQLVDALSAAGLGYIEVGSFVSPKWVPQMA 60
PA14_38490     MNLPKKVRLVEVGP RDGLQNEKQPI EVADKIRLVDDL SAAGLDYIEVGSFVSPKWVPQMA 60
PA2011         MNLPKKVRLVEVGP RDGLQNEKQPI EVADKIRLVDDL SAAGLDYIEVGSFVSPKWVPQMA 60
PFL_3934       MSLPSHVRLIEVGP RDGLQNEAQPI SVEDKVQLVDALAAAGLGYIEVGSFVSPKWVPQMA 60
PputW619_1943 MPLPEKVRLVEVGP RDGLQNEAQPI SVADKVRLVDDL TDAAGLAYIEVGSFVSPKWVPQMA 60
PSPPH_2629     MSLPQKVNIIVEVGP RDGLQNEAQPI SIDDKVRLVDDL TAAGLSHIEVGSFVSAKWVPQMA 60
* * * . : * . : : * * * * * * * * * * * * * * * * * * * * * * * * * * * * * *

```

```

Pf101_3654      GSAEVFAQIQRKPGV TYGALAPNLRGFEDALAAGVKEVAVFAAASEAFSQRNINCSISES 120
PA14_38490     GSAEVFAGIRQRP GVTYAALAPNLKGFEEALESVKEVAVFAAASEAFSQRNINCSIKDS 120
PA2011         GSAEVFAGIRQRP GVTYAALAPNLKGFEEALESVKEVAVFAAASEAFSQRNINCSIKDS 120
PFL_3934       GSAEVFARIQKPGV TYGALAPNLRGFEDALAAGVKEVAVFAAASQAFSQRNINCSISES 120
PputW619_1943 GSADVFAAIEQRAGV TYAALAPNLRGFEDALAAGVKEVAVFAAASEAFSQRNINCSISES 120
PSPPH_2629     GSAQVFENIQREGV IYSALAPNLRGFEDALAAGVREVAVFAAATEGFSPRNLNCSISES 120
* * * : * * * . : : * * * . * * * * * * * * * * * * * * * * * * * * * * *

```

```

Pf101_3654      LARFAPIMESAKQH GVTVRGVVSCVLGCPYEGEVAPEQVAMVARELYAMGCYEVSLGDTI 180
PA14_38490     LERFVPLEAARQH QVVRVGYISCVLGCPLYDGDVDPQVAVVARELQQMGCYEVSLGDTI 180
PA2011         LERFVPLEAARQH QVVRVGYISCVLGCPLYDGDVDPQVAVVARELQQMGCYEVSLGDTI 180
PFL_3934       LERFVPIMDAAK QHGISV RGVVSCVLGCPYEGEVAPEQVAMVARELHDMGCYEVSLGDTI 180
PputW619_1943 LNRFEPIMQAAR SHGVVRV RGVVSCVLGCPYEGRVSAEQVAPVAKALHEMGCYEVSLGDTI 180
PSPPH_2629     LERFAPIMAAAR MHGVQVRGVVSCVLGCPYEGSVSPQQVAAVANELYAMGCYEVSLGDTI 180
* * * * : : : * : * : * * * * * * * * * * * * * * * * * * * * * * *

```

```

Pf101_3654      GTGTAGATRRLFEV VSKQVPREKLAGHFHDTYGQAMANIYASLLEGI AVFDSSVAGLGGC 240
PA14_38490     GVG TAGATRRLIEAV ASEVPRERLAGHFHDTYGQALANIYASLLEGI AVFDSSVAGLGGC 240
PA2011         GVG TAGATRRLIEAV ASEVPRERLAGHFHDTYGQALANIYASLLEGI AVFDSSVAGLGGC 240
PFL_3934       GTGTAGATR RMFEV VQAQVPREKLAGHFHDTYGQALANVYASLLEGI AVFDSSVAGLGGC 240
PputW619_1943 GTGTAGDTRRLFEV VSAHVPRELQAGHFHDTYGQALANVYASLLEGI SVFDSSVAGLGGC 240
PSPPH_2629     GTGTAGDTRALFN AVSAQIPRGKLAGHFHDTYGQALVNIYASLEEGIQVFDSSVAGLGGC 240
* . * * * * * * * * * * * * * * * * * * * * * * * * * * * * * * * * *

```

```

Pf101_3654      PYAKGASGNVATEDV VYLLNGLGIETGIDL DALIAAGQQISSVLGRPTGSRVAKARSAQ- 299
PA14_38490     PYAKGATGNVASED VLYLLNGLEIHTGVDMHALVDAGQRICAVL GKSNGRRAAKALLAKA 300
PA2011         PYAKGATGNVASED VLYLLNGLEIHTGVDMHALVDAGQRICAVL GKSNGRRAAKALLAKA 300
PFL_3934       PYAKGASGNVATEDV VYLLNGLGIHTGIDMDRLIDAGRQICNVLGRPSGSRVAKARNAS- 299
PputW619_1943 PYAKGATGNVATEDV VYLLQGLGIETGIDL DRLIAAGQRISKVLGRANGSRVARARSAQ- 299
PSPPH_2629     PYAKGASGNVATEDV QYMLQGMGIETGVDLDQVIAAGQRICGVLRRSNGSRVARARLSA- 299
* * * * * * * * * * * * * * * * * * * * * * * * * * * * * * * * * *

```

| SeqA Name       | Len (aa) | SeqB Name       | Len (aa) | Score |
|-----------------|----------|-----------------|----------|-------|
| 1 Pf101_3654    | 299      | 2 PA14_38490    | 300      | 77    |
| 1 Pf101_3654    | 299      | 3 PA2011        | 300      | 77    |
| 1 Pf101_3654    | 299      | 4 PFL_3934      | 299      | 89    |
| 1 Pf101_3654    | 299      | 5 PputW619_1943 | 299      | 83    |
| 1 Pf101_3654    | 299      | 6 PSPPH_2629    | 299      | 78    |
| 2 PA14_38490    | 300      | 3 PA2011        | 300      | 100   |
| 2 PA14_38490    | 300      | 4 PFL_3934      | 299      | 77    |
| 2 PA14_38490    | 300      | 5 PputW619_1943 | 299      | 77    |
| 2 PA14_38490    | 300      | 6 PSPPH_2629    | 299      | 71    |
| 3 PA2011        | 300      | 4 PFL_3934      | 299      | 77    |
| 3 PA2011        | 300      | 5 PputW619_1943 | 299      | 77    |
| 3 PA2011        | 300      | 6 PSPPH_2629    | 299      | 71    |
| 4 PFL_3934      | 299      | 5 PputW619_1943 | 299      | 81    |
| 4 PFL_3934      | 299      | 6 PSPPH_2629    | 299      | 75    |
| 5 PputW619_1943 | 299      | 6 PSPPH_2629    | 299      | 78    |



**Pf101\_4213 (overlaps nov14)**

Pf101\_4213 MRRVVTGLGIVSCLGNDKETV SANLRASRPGIRFNPEYAEMGLRSQVSGSIDLNLEELI 60  
PA14\_43690 MRRVVTGLGIVSCLGNDKDTV SANLRAGRPGIRFNPSYAEMGLRSHVSGSVDLNLEELI 60  
PA1609 MRRVVTGLGIVSCLGNDKDTV SANLRAGRPGIRFNPSYAEMGLRSHVSGSVDLNLEELI 60  
PFL\_1736 MRRVVTGLGIVSCLGNDKETV SANLRASRPGIRFNPEYAEMGLRSQVSGSIDLNLEELI 60  
PputW619\_3498 MRRVVTGLGIVSCLGNDKATVTENLRNSRPGIRYNPEYKEQGLRSQVSGSIDLNLEELI 60  
PSPPH\_1989 MRRVVTGLGIVSCLGNDKETV TANLRANRPGIRFNPEYAEMGLRSQVSGSIDLNLEELI 60  
\*\*\*\*\* \*\* : \*\* . \*\*\*\*\* : \* . \* \* \*\*\*\*\* : \*\*\*\*\* : \*\*\*\*\*

Pf101\_4213 DRKIYRFVGHAAAYAYLAMKDAIADSGLTEEQVSNPR TGLIAGSGGASTLNQMEALDILR 120  
PA14\_43690 DRKVF RFMGDAAYAYLAMEQAIKDSGLTPEQISNPR TGLIAGSGGASTLNQMEADTLR 120  
PA1609 DRKVF RFMGDAAYAYLAMEQAIKDSGLTPEQISNPR TGLIAGSGGASTLNQMEADTLR 120  
PFL\_1736 DRKIYRFVGHAAAYAYLAMKDAIADSGLSEEQVSNPR TGLIAGSGGASTLNQMEALDILR 120  
PputW619\_3498 DRKVYRFVGHAAAYAYLAMQDAIKDAGLTEEQVSNPR TGLVAGSGGASTLNQMEALDILR 120  
PSPPH\_1989 DRKIFRFVGHAAAYAYLAMKDAITDSGLTEEQVSNVR TGLIAGSGGASTLNQMEALDILR 120  
\*\*\*\*\* : \* : \* . \*\*\*\*\* : : \* \* : \* : \* : \* : \* \* : \* : \* : \* : \* : \* : \* : \* : \* : \* : \*

Pf101\_4213 EKGVKRVGPYRVTRTMSSTVSACLATPFKIKGLNYSIASACATSAHCIGTAMEQIQMGKQ 180  
PA14\_43690 EKGVKRIGPYRVTRT MGSTVSACLATPFQIKGVNYSISSACATSAHCIGQAMEQIQLGKQ 180  
PA1609 EKGVKRIGPYRVTRT MGSTVSACLATPFQIKGVNYSISSACATSAHCIGQAMEQIQLGKQ 180  
PFL\_1736 EKGVKRVGPYRVTRTMSSTVSACLATPFKIKGLNYSIASACATSAHCIGTAMEQIQMGKQ 180  
PputW619\_3498 EKGVKRVGPYRVTRT MGSTVSACLATPFKIKGLNYSISSACATSAHCIGTAMEQIQMGKQ 180  
PSPPH\_1989 EKGVKRVGPYRVTRT MGSTVSACLATPFKIKGVNYSISSACATSAHCIGNAVEQIQLGKQ 180  
\*\*\*\*\* : \*\*\*\*\* . \*\*\*\*\* : \* : \* : \* : \* : \* : \* : \* : \* : \* : \* : \* : \*

Pf101\_4213 DIVFAGGEEHHSQSFLFDAMGALSSKRNDTPEQASRAYDADRDFVIAGGGGMVVVEE 240  
PA14\_43690 DVVFAGGEEHHSQSCLFDAMGALSTQYNETPEKASRAYDAKRDFVIAGGGGMVVVEE 240  
PA1609 DVVFAGGEEHHSQSCLFDAMGALSTQYNETPEKASRAYDAKRDFVIAGGGGMVVVEE 240  
PFL\_1736 DIVFAGGEEHHTQSFLFDAMGALSTQYNETPEKASRAYDAKRDFVIAGGGGMVVVEE 240  
PputW619\_3498 DIVFAGGEEHHSQSFLFDAMGALSTKRNDTPELASRAYDADRDFVIAGGGGMVVVEE 240  
PSPPH\_1989 DIVFAGGEEHHSQSFLFDAMGALSTQYNETPEKASRAYDAKRDFVIAGGGGMVVVEE 240  
\* : \*\*\*\*\* : \* \* \*\*\*\*\* : : \* : \* \* \* \* \* \* \* \* \* \* \* \* \* \* \* \* \* \* \* \* \* \* \* \* \*

Pf101\_4213 LEHALARGAKIYAEIVGYGATSDGYDMVAPSGEGAIRCMQQALSTVDTF-IDYLNTHGTS 299  
PA14\_43690 LEHALKRGAKIYAEIVGYGATSDGYDMVAPSGEGAIRCMQQALATVDAP-IDYLNTHGTS 299  
PA1609 LEHALKRGAKIYAEIVGYGATSDGYDMVAPSGEGAIRCMQQALATVDAP-IDYLNTHGTS 299  
PFL\_1736 LEHALARGAKIYAEIVGYGATSDGYDMVAPSGEGAIRCMEMAMSTVDTF-IDYLNTHGTS 299  
PputW619\_3498 LEHALARGAKIYAEIVGYGATSDGYDMVAPSGEGAIRCMQQALATVDTF-IDYLNTHGTS 299  
PSPPH\_1989 LEHALARGAKIYAEIVGYGATSDGYDMVAPSGEGAIRCMQMALGDINSGIDYINTHGTS 300  
\*\*\*\*\* \*\*\*\*\* : \* : . : : \* : \* : \* : \* : \* : \* : \* : \* : \* : \* : \* : \* : \*

Pf101\_4213 TPVGDVAEMKGVREVF GDKAPAISSTKSLSGHSLGAAGVHEAIYCMLMEGNFIAGSANI 359  
PA14\_43690 TPVGDVAEIRGVREVF GDKAPAISSTKSLSGHSLGAAGVHEAIYCLLMEGGFIAGSANI 359  
PA1609 TPVGDVAEIRGVREVF GDKAPAISSTKSLSGHSLGAAGVHEAIYCLLMEGGFIAGSANI 359  
PFL\_1736 TPVGDVAEMKGVREVF GDKAPAISSTKSLSGHSLGAAGVHEAIYCMLMEGNFMAGSANI 359  
PputW619\_3498 TPVGDVAEIKGVRAVFGDKAPKISSTKSLSGHSLGAAGVHEAIYCLLMENNFIAGSANI 359  
PSPPH\_1989 TPVGDVAEME VREVF GAKAPAISSTKSLSGHSLGAAGVHEAIYCLLMENNFIAGSANI 360  
\*\*\*\*\* . \* : . \* \* \* \* \* \* \* \* \* \* \* \* \* \* \* \* \* \* \* \* \* \* \* : \* \* \* . \* : \* : \* \* \* \*

Pf101\_4213 DELDPEVADLPVLTKTRENATINTVMSNSFGFGGTNATLV LKRWEG 406  
PA14\_43690 DELDPEVADLPILRETR ENAKLDTVMSNSFGFGGTNATLV LKRWQG- 405  
PA1609 DELDPEVADLPILRETR ENAKLDTVMSNSFGFGGTNATLV LKRWQG- 405  
PFL\_1736 DELDPEVADMPILT KTR EDATINTVMSNSFGFGGTNATLV LKRWQG 406  
PputW619\_3498 DELDPEVADLPILRKTEENAKIDTVMSNSFGFGGTNATLV LKRWTK 406  
PSPPH\_1989 DELDPVADMPILLKTR ED AKLDLVMSNSFGFGGTNATLV LKRWAG 407  
\*\*\*\*\* \* \* : \* : \* : \* . \* : \* : \* : \* : \* : \* : \* : \* : \* : \* : \* : \* : \*



| SeqA Name       | Len (aa) | SeqB Name       | Len (aa) | Score |
|-----------------|----------|-----------------|----------|-------|
| 1 Pf101_4213    | 406      | 2 PA14_43690    | 405      | 88    |
| 1 Pf101_4213    | 406      | 3 PA1609        | 405      | 88    |
| 1 Pf101_4213    | 406      | 4 PFL_1736      | 406      | 96    |
| 1 Pf101_4213    | 406      | 5 PputW619_3498 | 406      | 92    |
| 1 Pf101_4213    | 406      | 6 PSPPH_1989    | 407      | 89    |
| 2 PA14_43690    | 405      | 3 PA1609        | 405      | 99    |
| 2 PA14_43690    | 405      | 4 PFL_1736      | 406      | 88    |
| 2 PA14_43690    | 405      | 5 PputW619_3498 | 406      | 88    |
| 2 PA14_43690    | 405      | 6 PSPPH_1989    | 407      | 88    |
| 3 PA1609        | 405      | 4 PFL_1736      | 406      | 88    |
| 3 PA1609        | 405      | 5 PputW619_3498 | 406      | 88    |
| 3 PA1609        | 405      | 6 PSPPH_1989    | 407      | 88    |
| 4 PFL_1736      | 406      | 5 PputW619_3498 | 406      | 89    |
| 4 PFL_1736      | 406      | 6 PSPPH_1989    | 407      | 90    |
| 5 PputW619_3498 | 406      | 6 PSPPH_1989    | 407      | 88    |



Pf101\_4382 ERSTRDINQLADEVSKAVTEVEELAVNSEQIGSVLEVIRSAEQTNLLALNAAIEAARAG 597  
 PA14\_29760 DRTTQSIDS LAANLTSAMGQVEQLASSSEEIGSVLEVIRAEQTNLLALNAAIEAARAG 573  
 PA2654 DRTTQSIDS LAANLTSAMGQVEQLASSSEEIGSVLEVIRAEQTNLLALNAAIEAARAG 573  
 PFL\_4630 ERSTRDISLLADEVSKAVGEVEALAVSSEQIGSVLEVIRSAEQTNLLALNAAIEAARAG 585  
 PFLU4971 EQSTRDITTLAEVSKAVTEVEALAVNSEQIGSVLEVIRSAEQTNLLALNAAIEAARAG 575  
 ::\*:.\* \*\* :\*:.\* :\*\* \*\* .\*:\*\*\*\*\*:\*\*\*\*\*

Pf101\_4382 ESGRGFAVVADEVNRLAKRTQDSVEEIRVVIERIQGTGRGVVATMHSSQTQAHNNAGQIR 657  
 PA14\_29760 DAGRGFAVVADEVNRLARRTQDSVEQIRGVIEGLQQGTRD VVDAMHGSHRQAQGSVEQVD 633  
 PA2654 DAGRGFAVVADEVNRLARRTQDSVEQIRGVIEGLQQGTRD VVDAMHGSHRQAQGSVEQVD 633  
 PFL\_4630 ESGRGFAVVADEVNRLAKRTQDSVEEIRVVIERIQSGTRD VVTMHASQSQAQNNAGQIQ 645  
 PFLU4971 ESGRGFAVVADEVNRLAKRTQDSVEEIRLVIERIQSGTRGVVATMHSSQSQAQSNAGQIH 635  
 :\*:\*\*\*\*\*:\*\*\*\*\*:\*\*\* \*\* :\* \*\*.\* \*\* :\*:\*.\* \*\* :\*:. . . \*

Pf101\_4382 QAVDALGKISDAVTVISDMNLQIASAAEQSSAVAEVNRNVSAIRTVTETL TEQATESAA 717  
 PA14\_29760 EAVAALQRIGEAVTVINDMNLQIASAAEQSSVAEEINRNVA AIRDVTE SLSSQAEEESAQ 693  
 PA2654 EAVAALQRIGEAVTVINDMNLQIASAAEQSSVAEEINRNVA AIRDVTE SLSSQAEEESAQ 693  
 PFL\_4630 QAVQALGKISDAVTVISDMNLQIASAAEQSSAVAEVNRNVSAIRTVTETL TEQASESAQ 705  
 PFLU4971 QAVQALGKISDAVTVISDMNLQIASAAEQSSAVAEVNRNVSAIRTVTETL TGQATESAA 695  
 :\*\* \*\* :\*.:\*\*\*\*\*:\*\*\*\*\*:\*\*\*:\*\*\*\*\*:\*\*\*:\*\*\* \*\*.\* \*\* :\* \*\* \*\*

Pf101\_4382 ISSQLNALASQQMKLMDQFRV 738  
 PA14\_29760 VSQSLNRLANHQQLMEQFKA 714  
 PA2654 VSQSLNRLANHQQLMEQFKA 714  
 PFL\_4630 VSSQLNALATQQMKLMDQFRV 726  
 PFLU4971 ISSQLNALASQQMKLMDQFKV 716  
 :\*..\*\* \*\*.\* \*\* \*\*.\*\*\*.\*

| SeqA Name    | Len (aa) | SeqB Name    | Len (aa) | Score |
|--------------|----------|--------------|----------|-------|
| 1 Pf101_4382 | 738      | 2 PA14_29760 | 714      | 52    |
| 1 Pf101_4382 | 738      | 3 PA2654     | 714      | 52    |
| 1 Pf101_4382 | 738      | 4 PFL_4630   | 726      | 80    |
| 1 Pf101_4382 | 738      | 5 PFLU4971   | 716      | 80    |
| 2 PA14_29760 | 714      | 3 PA2654     | 714      | 99    |
| 2 PA14_29760 | 714      | 4 PFL_4630   | 726      | 54    |
| 2 PA14_29760 | 714      | 5 PFLU4971   | 716      | 53    |
| 3 PA2654     | 714      | 4 PFL_4630   | 726      | 54    |
| 3 PA2654     | 714      | 5 PFLU4971   | 716      | 53    |
| 4 PFL_4630   | 726      | 5 PFLU4971   | 716      | 78    |
