# Supplementary material for: Proteomic Detection of Non-Annotated Protein-Coding Genes in Pseudomonas fluorescens Pf0-1
Source: PubMed Central journal article supplement (PMC2794547; doi:10.1371/journal.pone.0008455), 2009-12-24
Supplement: pone.0008455.s002.pdf [file pone.0008455.s002.pdf]

**Figure S2.** Alignment of Nov proteins with putative proteins identified using TblastN. Alignments were generated with ClustalW2 (<http://www.ebi.ac.uk/Tools/clustalw2/index.html> ). Full start codon to stop codon sequences in each genome were determined by examining the sequence in the Artemis genome browser (<http://www.sanger.ac.uk/Software/Artemis/>).

**Colors in alignments:**

- RED = AVFPMILW (small+ hydrophobic (incl.aromatic -Y))
- BLUE = DE (Acidic)
- MAGENTA = RK (Basic)
- GREEN = STYHCNGQ (Hydroxyl + Amine + Basic - Q)

**Consensus symbols in the alignments:**

- \* = residues or nucleotides in that column are identical in all sequences in the alignment.
- : = conserved substitutions.
- . = semi-conserved substitutions.

**Nov1**

*P. fluorescens* Pf-5 ORF is the complement of Bases 798825..799727

```

nov1          VGRGQRRRHRSFAFAGADFRAVLHHQTGGRRHWPLVGLRHRREHGRTPERAQRRRRPV 60
Pf-5          VGRGQWWRHRPAPAGADLRAVLHHQAGGHRHRARAVGELWHRAEHGGPPERQQQPGRRAL 60
          *****  ***_*  *****:*****:***:**  .  ***** **  ***  .***  *:  **.:

nov1          LHRiADRPrrSDHQRRPRLTT-EIGADIDLIEVDPQGHQQRVDEGVEQRTEHRIDGGDQ 119
Pf-5          LHRtADRRGGSDHQVGLAGLPAGEVGFPHFVHQVDPQPRQQVIQQRVQQRAQEPGDQRE 120
          ***  ***  *****  .  *.:  *:*.:.:.:  :*****  :**  :::  *:***:..  *  :

nov1          QGLHGAQNRPQSTDQTAR-----RAMHVEVEVVQGVAAADHVAG----- 159
Pf-5          QVADPADGRSQPRDNGFPQVVVDRLVDDQVDAGQGARQAVDDVRGRGRRLVSRGLVDVGR 180
          *  .  *:*.*.  *:  .:  *  :.  :*:..  **  **.*.*  *

nov1          -----AVAVIERRLVLDLRQT----- 174
Pf-5          YRKRrrRRAgEHQVLSILRHAGVDHHRDAAARVVHHRVAAPRQDQELVAGAYAQVHQRQRL 240
          *  .  *.:*:..  **

nov1          ----GSRRCGVDMGDVGVLADG----GIG----- 195
Pf-5          HHGLGGRRKIGIRVDLADLQVGDGTDMGGQALGPAVVHRAAVVGDIGNRAPRVQAQVDL 300
          *.**  *:.  *:.  *  *  *  :*:

nov1          -
Pf-5          R 301

```

| SeqA Name | Len(aa) | SeqB Name | Len(aa) | Score |
|-----------|---------|-----------|---------|-------|
| 1 nov1    | 195     | 2 Pf-5    | 301     | 43    |

**Nov2**

*Photorhabdus asymbiotica* ATCC43949 bases 1393742 to 1393996

*Yersinia pestis* D182038 bases 4332492 to 4332238

*Escherichia coli* strain J plasmid Cole9-J bases 3807 to 4067; gene is ceiI.

```

nov2                MKFKNKFFEEYTEAEYVALINRLVEGDYSSEKEHDAIVDNIVKTSEHPNGTDVLYYPEEGT 60
Photorhabdus       MKLKNKLEEYTENEFIDLISRIIS-DEGTEKEQDTLLENFIKITEHPSGTDLIYYPENGE 59
Yersinia           MELKEKYEDYTEHEFLEFIRNICEVNTDSQSLHSSWVRHFTKITEHPSGSDLIYYPEDGA 60
Escherichia        MELKHSISDYTEAEFLQLVTTICNADTSSEELVKLVTHFEEMTEHPSGSDLIYYPKEGD 60
                   *::*.. .:*** *: : : . : .:.. : : : :***.**:***:*
  
```

```

nov2                DDSPAGVLETIKAWRAANGKPGFKNEE 87
Photorhabdus       NDSPEGILKTIKEWRAKNGKPGFKE-- 84
Yersinia           DDSPEGILELVKKWRAENGKPGFKK-- 85
Escherichia        DDSPSGIVNTVKQWRAANGKSGFKQG- 86
                   :*** *::: :* *** ***.***:
  
```

| SeqA Name      | Len(aa) | SeqB Name      | Len(aa) | Score |
|----------------|---------|----------------|---------|-------|
| 1 nov2         | 87      | 2 Photorhabdus | 84      | 58    |
| 1 nov2         | 87      | 3 Yersinia     | 85      | 49    |
| 1 nov2         | 87      | 4 Escherichia  | 86      | 47    |
| 2 Photorhabdus | 84      | 3 Yersinia     | 85      | 55    |
| 2 Photorhabdus | 84      | 4 Escherichia  | 86      | 52    |
| 3 Yersinia     | 85      | 4 Escherichia  | 86      | 57    |

**Nov3 (note that full sequence from P. putida is not shown)**

*P. fluorescens* SBW25 bases 5525882 to 5526268

*P. putida* KT2440 (*P. p* KT2440) complement of bases 1184848 to 1188960

```

nov3      MAQLKSRHYRANQLIANDKLDLPLLDPLNLPSTLNERLTPVQRPKLTAKHLPSTVVIVT 60
SBW25     MAKLECSHDSHNQLIRHHQLNLPFLNHFNLALHPNKRLLAAVQRAELALAQHLPGAADVVA 60
P. p KT2440 VALLERSDDLHNQLVSHHQHLPLFHRDLARLPEERLAAVQRAELALAKGLPGAVVIVT 60
          :* *: .   ***: ::*:*:*: ::* . *::**:.***.:*:*: **:.***:
nov3      DPPTTGSEYSLLDHLDMTVGNKKRELVHSA----- 90
SBW25     DAPAAACEDGGFHLHVAVGHEEAELVHGLSSP----- 93
P. p KT2440 DAPAAARGEHSGLDHFDMAGGDEEGELVHALVHPPRVAEHTHQRSIFLPLVRAPGVLHSA 120
          *.*: : * . :.:*:*: *.: :****.
nov3      ----- 180
SBW25     -----TR----- 95
P. p KT2440 EHTLRVRRHHDGHAAVAAGQAGDTRRAVRVGRVGFGLAMVVDVAQGHATGHIQFCFF 180
nov3      ----- 240
SBW25     ----- 240
P. p KT2440 AGELGMAFAVGDGRHARTGHALQEDRVGLLHFDHGHAGLELLRAVAHEVVRPVLGARDQL 240
nov3      ----- 300
SBW25     -----GRCGTCASRRRPPPTLPGATS----- 116
P. p KT2440 VQVGHHLATVAHAQGEAVGTLEEGLEGVGTGTGVEQRRLGPAFASAQHVTVREAATGDQAL 300
nov3      ----- 360
SBW25     -----SARRG----- 121
P. p KT2440 EGFVDTASENIAHVHVDGGEAGAVEGSSHLDLAVDALLAQDGHRAHALLDVRRGDVVV 360
nov3      ----- 420
SBW25     -----IHAPGAAS----- 129
P. p KT2440 DVEAQLHRQARVVFLQQVELLISAVGVVAQALDLVAGFSPALAQHATVIVEQHFVAVQAD 420

```

| SeqA Name | Len (aa) | SeqB Name | Len (aa) | Score |
|-----------|----------|-----------|----------|-------|
| 1 nov3    | 90       | 2 SBW25   | 129      | 42    |
| 1 nov3    | 90       | 3 P. p    | 1371     | 46    |
| 2 SBW25   | 129      | 3 P. p    | 1371     | 48    |

Nov 4 - No significant hits

Nov 5 - No significant hits

Nov 6 - No significant hits

Nov 7 (note the stop codon in SBW25)

*P. fluorescens* SBW25 bases 3312166 to 3312351

*P. fluorescens* Pf-5 complement of bases 3558023 to 3558211

```

nov7          -----LTKALSCARKVSPVPTGTVDFSTRISGF 29
SBW25        MRSGRRQSATAEPLRNSGLETIISKSKCRPARCKAFSICARRVSPVPTGTVDFSTRITGS 60
Pf-5         -----VTAEPLRNSGLETISNCSARP--SRTFSMWAFFKVS PVPTGTVDFSTRITGC 50
                                     :::* * :*****:*
```

```

nov7          SRCRATASPTDST 42
SBW25        LR*RATASPTDST 73
Pf-5         SRWRATASPTDST 63
               * *****
```

| SeqA Name | Len(aa) | SeqB Name | Len(aa) | Score |
|-----------|---------|-----------|---------|-------|
| 1 nov7    | 42      | 2 SBW25   | 73      | 78    |
| 1 nov7    | 42      | 3 Pf-5    | 63      | 73    |
| 2 SBW25   | 73      | 3 Pf-5    | 63      | 77    |

**Nov8**

*P. fluorescens* SBW25 bases 2894607 to 2895233

```

nov8      VHHIAHGQLHHFAADGARNVGDRRDDLRRHMARCGVGTDHLADLLLQRVIQRYAVLEVHEQ 60
SBW25     VHHIAHRQFNDLAADGAGDIGSEDLRRYVAGCGVGADHLADLLKGFIQLDTVIEAHEQ 60
          ***** *:::***** ::** :*****:* *****:*****: .** :*:.***

nov8      HHAHIVLPLLADGDAVQHLRDFLHLTVDFRRADAHAAGVEHGVGAAVNQHPAVGQLFGVV 120
SBW25     HHPYVILPALANGQALLHLRDFFHLAINLCRADAHATGVEHRVGTPNQQAAVGALLGIV 120
          **.:** **:*:*: *****:***::: *****:***** **:.***:.* **:*:*

nov8      TLGPDAGELAEIGFAQFLAIGIVPESDHRRK----- 152
SBW25     ALGPDTGELAEIRGAQLLAIRVVPQADGHGRKVPGAHQFAFFADQRLALVVPHFNRHCQA 180
          :***:***** **:*** :*::* * **

nov8      -----
SBW25     LALHFAAPHRQHWVADHKAGNDIGATGHG 209

```

| SeqA Name | Len(aa) | SeqB Name | Len(aa) | Score |
|-----------|---------|-----------|---------|-------|
| 1 nov8    | 152     | 2 SBW25   | 209     | 62    |

**Nov9 - No significant hits**

**Nov10**

*P. fluorescens* Pf-5 bases 2411768 to 2411950

```

nov10      MSMAMLNKMHMNGYDVLSVNNGPWRVCTQGDRLASFASREEALAYAAALPGYKSRARGRK 60
Pf-5      MSTPLLNKLQINGYQVLSVNHGPWKVCTPGDRLATFGTREETAMAFAAALPARRQRPAATG 60
          ** .:***::***:*****:***:*** *****:*.:***:*:*****. :.*. .
    
```

```

nov10      AD 62
Pf-5      G- 61
    
```

| SeqA Name | Len(aa) | SeqB Name | Len(aa) | Score |
|-----------|---------|-----------|---------|-------|
| 1 nov10   | 62      | 2 Pf-5    | 61      | 59    |

**Nov11**

*P. fluorescens* SBW25 complement of bases 4286966 to 4287352

```
nov11      VLFRRFHDRREPRQAFADRAIDVALRKRFGRSKHRDFLHSRRKCFKTAQVRRQCTIGY 60
SBW25      VLPGRRHDRRKAFQAFADGTVDIALGKRLGRRRKHRHFLHAGCQCIVLETAQVRRQGTVGH 60
          ** * *****:. ***** :::** **:** ** **.****: :*:::***** *:**:
```

```
nov11      AGLALDLREHLGGTGHLLRHPLGRDETADFYIAETGGAQRVDQLHLVGDADGLGFVLQAVT 120
SBW25      AGPALDLREYLRAGHLRHPLGRDETADFDIAQAGSAECVHQPDEFVRHADRLGFVLQAVA 120
          ** *****:** :***** **:**.*: *.* .:* .** *****:
```

```
nov11      RADFDQAYLGEGHGVDLLFEFLRNPWDLFRLLN 155
SBW25      RADFHQAYV----- 129
          ***.****:
```

| SeqA Name | Len(aa) | SeqB Name | Len(aa) | Score |
|-----------|---------|-----------|---------|-------|
| 1 nov11   | 155     | 2 SBW25   | 129     | 65    |

**Nov12 - No significant hits**

**Nov13**

*P. fluorescens* Pf-5 Bases 4883762 to 4885246  
*P. fluorescens* SBW25 Bases 4862082..4863530

```

nov13      VDHQLAERRLLHLPAGQHIGRQAAHQQIADHGADAHAGYQPQFAPGQARHAQLGNRPGVFR 60
Pf-5      VDHQLPQRRLHLPAGQHFGRQAPRQQVADHGADHPGHQPQLAPGQARHAQLGNRPGVLR 60
SWB25     VDHQLTQRRLHLPAGQHLRRQAAHQQIADHGADHPRHQRQPAPGKTRHAQLRDRPGVLR 60
          *****:*****: **.:*:*****. :* * **.:***** :****:*

nov13      QRARAPAQSHRPRRRRVHDADAAVPGGT PVRCGQHDQGGPILRRQHHRVQLGAQDLRQRA 120
Pf-5      QCAGASTQPHRPRRRRFHDADAAVPGGTAVRRGEHDQGGVLRGQHHRVQLGAQDLRQPA 120
SWB25     RRARAAAQPHRPRRRGVHDADAAVPGRTPVRRGQHDQGGP GALHRHHHRILQGAPDLRQGA 120
          : * *.:*.***** .***** *.* * :***** * : :****:**** *****

nov13      DRQSGDSLPPRRVADFRNMPAGAGLSGHRAIRQRPGRHPTGVDGQAQGRTSRSGSQRQLP 180
Pf-5      DRQPGDPLPPGRAVHRDRVAPGGLPGHRAVCTRPGRDPAGFHGQAQGRAPGPRGQRQLP 180
SWB25     DRQPGHPLSPGRTLHRNMPARAGLPGHRAIHQRPRDSPLHGQAQGRAPGPRSQRQLP 180
          ***. *..* * * .*: **: * * .*****: ***** ..*..*****: . . .*****

nov13      AILGRHGLHVGQPGGPRLPRAAGIDWRRRR----- 211
Pf-5      AILGRHGLHVGQPGGPGLSRCAPGVHRRRCRRDHAGDHLQAHGHPAGEKEMNPLPACQTL 240
SWB25     AILGRHGLHVGQPRRPRLSRCAPGLDRRRRRRNHAGHPLQTDGHLAWEKAMN-----TL 234
          ***** * * * * .: . * * *

nov13      -----
Pf-5      LLEPRNGVLFISLNRPNRNAMSLQMV AELRTVMAAVDRRSIRALVLRGTGEHFCAGGD 300
SWB25     LLEPHNGVLHITLNRPENRNAMSL EMVNELRTVLAQLDS--QVRALVISGAGGHFCAGAD 292

nov13      -----
Pf-5      LKDMAGARAHGSAAYRELNRAFGALLEEAQHLPQVLVQVVLQGAVLGGGFGLACVSDIAIA 360
SWB25     VKDLVTAGNQ----LQALNRAFGTLLQVEEAVPQVVIVVLQGAVLGGGFGLACVSDIAIA 348

nov13      -----
Pf-5      EHSAQFGMPETSLGLLPAQIAPFVVQRIGLAQARRLALTAARFDGAQQRLLGLVHFVEND 420
SWB25     DHQAQFGLPETSLGLLPAQIAPFVVKRIGLTQARRLALTAARFDGLEAERLGVVHFTERD 408

nov13      -----
Pf-5      AKALHERLEQQLSLVLRCAPGANAA TKALLASVDQPQGPLLDQAANDFANAVLGEEGVE 480
SWB25     PQALAEERLDDVLGQVLRCAPGANGRTK SLLLASVDEPLEAVLDRGAQWF AEAVRSEEGIE 468

nov13      -----
Pf-5      GTLAFVQKRKP AWAN 495
SWB25     GTQAFVQKRKP RWCK 483
  
```

| SeqA Name | Len(aa) | SeqB Name | Len(aa) | Score |
|-----------|---------|-----------|---------|-------|
| 1 nov13   | 211     | 2 Pf-5    | 495     | 74    |
| 1 nov13   | 211     | 3 SWB25   | 483     | 74    |
| 2 Pf-5    | 495     | 3 SWB25   | 483     | 72    |



**Nov14**

*P. fluorescens* Pf-5 bases 1942080..1942268

```
nov14      LHDKRFILAPLKMPFSKRKKTPRTGRGVFMC GSAGGN YLPSQRFSTRVALVPPKPKLLLI 60  
Pf-5      -----LPCQRFSTRVALVPPKPKLLLI 22  
                **_* ** *****
```

```
nov14      TVLMVAFSVLVSTGRSATSGSSSSMLAEPAMKLP SIISMQ 101  
Pf-5      TVLMVASSVLVRI GISATSGSSSSMLAEPAMKLP SIISMQ 63  
                ***** * *****
```

| SeqA Name | Len(aa) | SeqB Name | Len(aa) | Score |
|-----------|---------|-----------|---------|-------|
| 1 nov14   | 101     | 2 Pf-5    | 63      | 90    |

Nov15

P. fluorescens Pf-5 complement of bases 5341606..5343108

P. aeruginosa PA14 Bases 2576991..2578589

nov15 VGGGAHLVGGGCHLIDLAELHLHAFAGLAGDFRRLIGGATGLGDALFDLGDGRLQLVEEA 60
Pf-5 VSGGAHFVGGGGHLIDFAELHLHAFAGLAGDFRRLVGGAPGFGDALFDLGDGRLQLVEEA 60
PA14 LSGGHLVCGCGDLIDLAELLLHAGAGLAGNRRRLVGGTARIAHRDLHVADDRQLLVEET 60
:\*. \* : \*\* \* . \*\*\* : \*\*\* \*\* : \*\*\*\*\* : \*\* : \*\* : . . . . : . : . \* . \*\*\*\*\* :

Table with 5 columns: SeqA Name, Len(aa), SeqB Name, Len(aa), Score. It lists sequence alignments between nov15, Pf-5, and PA14.

**Nov16**

*P. fluorescens* Pf-5 PFL\_5052; Bases 5812292..5812516  
*P. putida* KT2440 complement of Bases 919306..919527

Nov16 MSNSMGIASAFVLSSLILSPLAMAEESQTFVAQNAAARAHAFEQHQAEVMAKAQDATQAPQ 60  
Pf-5 MSNSMGIASAFVLSSLFVAPMAMAEESQGFVARNAARAAAFEQQAQIAQAAQQQNTQQAQK 60  
KT2440 MSNSMGIASVFLSSLLSPLAMAEESPAFVARNAEIAAVHQEARDAVAANKADTVKDAK 60  
\*\*\*\*\*\_\*\*\*\*\*:::\*:\*\*\*\*\* \*\*\*:\*\* \* ..:: : \*: :: : :

Nov16 AATSQAQA-SEKDS 73  
Pf-5 ITAEQSKSDTQKDS 74  
KT2440 QTASKVSVDTADS 74  
:::. . :. \*\*

| SeqA Name | Len(aa) | SeqB Name | Len(aa) | Score |
|-----------|---------|-----------|---------|-------|
| 1 Nov16   | 73      | 2 Pf-5    | 74      | 57    |
| 1 Nov16   | 73      | 3 KT2440  | 74      | 47    |
| 2 Pf-5    | 74      | 3 KT2440  | 74      | 56    |
