# Supplementary material for: Proteomic Detection of Non-Annotated Protein-Coding Genes in Pseudomonas fluorescens Pf0-1
Source: PubMed Central journal article supplement (PMC2794547; doi:10.1371/journal.pone.0008455), 2009-12-24
Supplement: pone.0008455.s003.pdf [file pone.0008455.s003.pdf]

**Table S1. Primers used in RT-PCR**

| <b>Locus</b> | <b>RT/reverse primer (5'-3')</b> | <b>Forward Primer (5'-3')</b> |
|--------------|----------------------------------|-------------------------------|
| <i>nov1</i>  | TCGGCCAGAACGCCAACATC             | GAGCACCGTATTGATGGTGG          |
| <i>nov2</i>  | AAACTCCTGCCGGACTGTCC             | TGAGGAATATACGGAAGCCG          |
| <i>nov3</i>  | AAGGAGGCTGTATTCGCTGC             | CCACTACCGAGCGAATCAAC          |
| <i>nov4</i>  | TCTACCATTTTGCTGAGGGC             | TACAGGGCACTGGATTGACG          |
| <i>nov5</i>  | GACCTAACAGTCCCATCCCC             | GTGAAAGTCCCAGGCCCTC           |
| <i>nov6</i>  | G TTCAGTCCGATGCCTTGCG            | TGGTGATATCGCCGTATTGC          |
| <i>nov7</i>  | TGTGCTGTCCGGTGGGCGATG            | ATCCAGATGCGCACGCAAAG          |
| <i>nov8</i>  | TGACTACGCCGAACAAC TGC            | GTGGTGT TGGCACGGATCAC         |
| <i>nov9</i>  | ACTTGTCCGGATCCTCGTCC             | ATTCCCCAGTGAAGAGCAGG          |
| <i>nov10</i> | GGCTTTTGTACCCCGGCAGC             | GCACATGAATGGCTACGACG          |
| <i>nov11</i> | CAAGTGGGTGCCGCAGATGG             | TTCCATGATCGGCGCGAACC          |
| <i>nov12</i> | GCGTGCTGAGGAAAGGGGAG             | GAGGAAAACAGCTTCGTCGG          |
| <i>nov14</i> | GCATGCTGATGATGGAAGG              | ATTACTTGCCTTCCCAGCG           |
| <i>nov15</i> | ACCTGCCGAAACAAGTGCT              | CTCGGTGATGCTCTGTTTGA          |
| <i>nov16</i> | TCTCAGAAGCTTGAGCCTGC             | AATCCCAGACGTTTGTAGCG          |
